# Supplementary material for: Hair Metabolomics: Identification of Fetal Compromise Provides Proof of Concept for Biomarker Discovery
Source: PubMed Central journal article supplement — Theranostics. 2014 Jul 20;4(9):953–9. doi: 10.7150/thno.9265 (PMC4107295; doi:10.7150/thno.9265), 2014-07-20
Supplement: thnov04p0953s1.pdf [file thnov04p0953s1.pdf]

## Supplementary materials

**Table S1.** Identified metabolite average values (Avg.) and standard deviations (St. dev.) in maternal hair samples of Fetal Growth Restriction (FGR) case and control groups. Values given as relative abundance normalized by internal standard. Only metabolites generating statistically significant scores ( $p < 0.01$ ) are presented.

| Metabolite                        | FGR Case |          | Control |          | Class                  |
|-----------------------------------|----------|----------|---------|----------|------------------------|
|                                   | Avg.     | St. dev. | Avg.    | St. dev. |                        |
| NADP_NADPH                        | 0.56     | 1.09     | 0.04    | 0.02     | Cofactors              |
| Palmitate (C16_0)                 | 12.39    | 6.66     | 4.53    | 3.94     | Saturated fatty acids  |
| 2-Methyloctadecanoate             | 5.08     | 3.66     | 1.86    | 0.94     |                        |
| Myristate (C14_0)                 | 2.72     | 1.32     | 1.05    | 0.78     |                        |
| Margarate (C17_0)                 | 0.76     | 0.39     | 0.34    | 0.21     |                        |
| Stearate (C18_0)                  | 23.17    | 15.63    | 12.22   | 9.93     |                        |
| Dodecanoate (C12_0)               | 2.28     | 1.54     | 1.21    | 0.93     |                        |
| Octanoate (C8_0)                  | 1.63     | 1.03     | 0.94    | 0.65     |                        |
| Heptadecane                       | 6.97     | 6.23     | 2.25    | 1.84     | Others                 |
| Nicotinamide                      | 7.47     | 6.47     | 2.51    | 1.84     |                        |
| 3-Hydroxybenzoate                 | 0.84     | 0.30     | 1.10    | 0.40     |                        |
| Levulinic acid                    | 0.53     | 0.29     | 0.70    | 0.25     |                        |
| 1-Aminocyclopropane-1-carboxylate | 5.09     | 2.50     | 6.75    | 2.19     |                        |
| Citraconate                       | 10.03    | 3.97     | 18.32   | 6.17     |                        |
| Lactate                           | 2.32     | 1.27     | 4.65    | 2.05     |                        |
| Glycine                           | 705.66   | 126.35   | 836.14  | 185.05   | Amino acids            |
| Proline                           | 490.94   | 127.65   | 644.87  | 178.90   |                        |
| Isoleucine                        | 15.08    | 1.94     | 20.71   | 4.78     |                        |
| Serine                            | 14.99    | 5.13     | 22.86   | 12.74    |                        |
| Leucine                           | 94.08    | 11.90    | 144.74  | 36.69    |                        |
| Glutamate                         | 51.02    | 10.11    | 79.46   | 24.06    |                        |
| Phenylalanine                     | 47.23    | 6.25     | 74.94   | 19.57    |                        |
| Alanine                           | 207.36   | 34.75    | 329.71  | 94.81    |                        |
| Valine                            | 84.55    | 11.46    | 140.65  | 43.98    |                        |
| Aspartic acid                     | 88.72    | 13.73    | 149.53  | 35.03    |                        |
| Threonine                         | 38.49    | 22.30    | 72.19   | 29.08    |                        |
| Tyrosine                          | 5.56     | 4.09     | 11.69   | 10.16    |                        |
| Methionine                        | 0.39     | 0.08     | 1.14    | 1.58     |                        |
| Lysine                            | 0.85     | 0.72     | 3.10    | 3.15     |                        |
| Pyroglutamate                     | 14.90    | 10.35    | 23.93   | 14.28    | Amino acid derivatives |
| Ornithine                         | 11.77    | 9.00     | 34.30   | 23.76    | Amino acid derivatives |
| Glutathione                       | 3.33     | 1.58     | 7.37    | 3.28     | Antioxidants           |
